# Supplementary material
Source: Springer Nature journal article supplement (https://www.springermedizin.de/resource/supplementary/12916_2012_589_MOESM8_ESM.pdf/9598210)

## Treatment Benefit by Outcome Group compared with untreated ADHD

Outcomes in Each Outcome Group

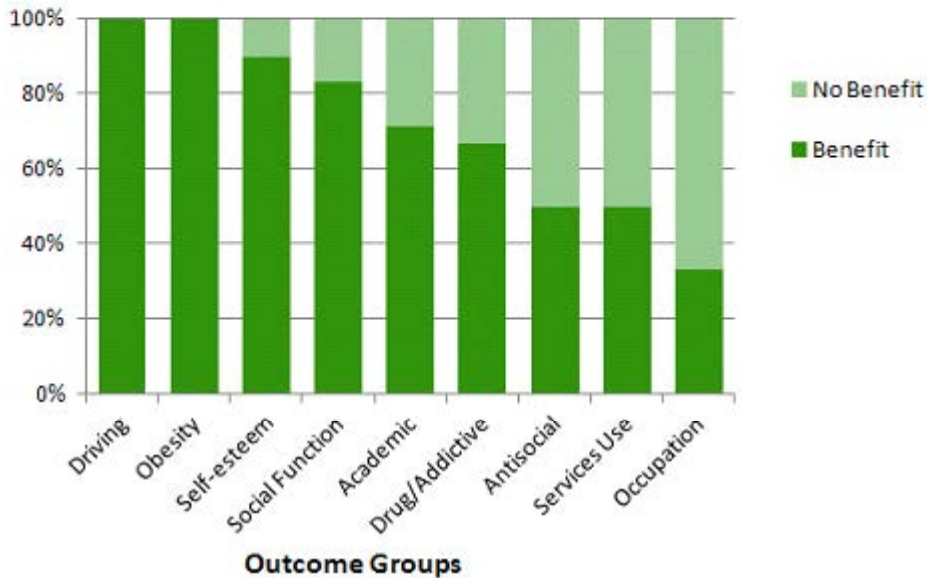

Supplement: MOESM8 [file 9598210]
